# Supplementary material for: The Small RNA GcvB Promotes Mutagenic Break Repair by Opposing the Membrane Stress Response
Source: PubMed Central journal article supplement (PMC5116933; doi:10.1128/jb.00555-16), 2016-11-18
Supplement: JB.00555-16_zjb999094258so1.pdf [file JB.00555-16_zjb999094258so1.pdf]

## SUPPLEMENTAL INFORMATION

**TABLE S1** Genome coordinates of nine non-polar sRNA-gene deletions created

| New allele <sup>a</sup> | Basepairs deleted <sup>b</sup> |
|-------------------------|--------------------------------|
| $\Delta$ <i>cyaR</i>    | 2,165,179 – 2,165,263          |
| $\Delta$ <i>dsrA</i>    | 2,023,212 – 2,023,376          |
| $\Delta$ <i>gcvB</i>    | 2,940,679 – 2,940,961          |
| $\Delta$ <i>micF</i>    | 2,311,065 – 2,311,237          |
| $\Delta$ <i>oxyS</i>    | 4,156,267 – 4,156,457          |
| $\Delta$ <i>rprA</i>    | 1,768,358 – 1,768,539          |
| $\Delta$ <i>rybB</i>    | 887,161 – 887,319              |
| $\Delta$ <i>ryhB</i>    | 3,578,911 – 3,579,079          |
| $\Delta$ <i>spf</i>     | 4,047,883 – 4,048,069          |

<sup>a</sup> Nonpolar deletions of the sRNA genes were recombineered (1) using PCR with pKD3 (1) as a template, to replace the *E. coli* sequences indicated with the chloramphenicol acetyl transferase gene flanked by FRT sites: FRT*cat*FRT. The *cat* gene and one FRT were removed by Flp recombinase for all final strains used in experiments. These are non-polar because they have no intervening transcription unit that might affect expression of downstream genes.

<sup>b</sup>Coordinates correspond to the MG1655 genome positions (NC\_000913.2) of the sequences deleted.

**TABLE S2**  $\sigma^S$  negative-regulatory gene *rssB* is epistatic to  $\Delta gcvB$  in MBR

| Relevant genotype         | Mean mutation rate | <i>p</i> value (mutation rate relative to WT) | Mean fold-change in mutation rate over WT | Mean fold-change in mutation rate over $\Delta gcvB$ | $\frac{\Delta rssB \Delta gcvB / \Delta gcvB}{\Delta rssB/WT}$ |
|---------------------------|--------------------|-----------------------------------------------|-------------------------------------------|------------------------------------------------------|----------------------------------------------------------------|
| WT                        | 33 ± 11            |                                               | 1                                         | 8.1 ± 1.4                                            |                                                                |
| $\Delta rpoS$             | 4.5 ± 0.4          | 0.05                                          | 0.18 ± 0.04                               | 1.2 ± 0.2                                            |                                                                |
| $\Delta gcvB$             | 3.8 ± 0.8          | 0.05                                          | 0.13 ± 0.02                               | 1                                                    |                                                                |
| $\Delta rssB$             | 120 ± 19           | 0.006                                         | 4.4 ± 0.7                                 | 33 ± 3.7                                             |                                                                |
| $\Delta rssB \Delta gcvB$ | 130 ± 31           | 0.04                                          | <b>4.3 ± 1</b>                            | <b>31 ± 2.5</b>                                      | <b>7.9 ± 1.7</b>                                               |

Epistasis analysis: quantification of single and double mutants, fold change in mutation rate. The mutation rate (Lac<sup>+</sup> cfu/10<sup>8</sup> cells/day, mean ± SEM) is decreased in  $\Delta gcvB$  cells. The fold changes of each strain compared with either wild-type (SMR4562) or  $\Delta gcvB$  (SMR20238) were calculated for each experiment and averaged. Mean fold-difference of ratios of mutation rate for double mutants relative to control were calculated by taking the ratio of  $\Delta rssB \Delta gcvB$  to  $\Delta gcvB$  and dividing by the ratio of  $\Delta rssB$  to WT for all three experiments averaged together. A value greater than one indicates suppression of the MBR defect by  $\Delta rssB$  (upregulation of  $\sigma^S$ ). The ratio of mutation rate for the double mutant was statistically significant and thus indicates that the MBR defect in  $\Delta gcvB$  was relieved by  $\Delta rssB$ . The data imply that GcvB promotes MBR by allowing the  $\sigma^S$  response and is not needed when  $\sigma^S$  is otherwise upregulated.

**TABLE S3** Known and predicted targets of GcvB

| <b>Target</b> | <b>Experimental evidence</b>    | <b>Computationally predicted<sup>a</sup></b> | <b>References</b> |
|---------------|---------------------------------|----------------------------------------------|-------------------|
| <i>argT</i>   | RNA:RNA interaction             | yes                                          | (2)               |
| <i>aroP</i>   | RNA:RNA interaction             | no                                           | (2)               |
| <i>bamD</i>   | RNA:RNA interaction             | no                                           | (2)               |
| <i>cfa</i>    | RNA:RNA interaction             | no                                           | (2)               |
| <i>csgD</i>   | regulation                      | no                                           | (3, 4)            |
| <i>cstA</i>   | RNA:RNA interaction             | no                                           | (2)               |
| <i>cycA</i>   | regulation, RNA:RNA interaction | yes                                          | (2, 5)            |
| <i>cysB</i>   | RNA:RNA interaction             | no                                           | (2)               |
| <i>dppA</i>   | regulation, RNA:RNA interaction | yes                                          | (2, 6, 7)         |
| <i>ebgR</i>   | RNA:RNA interaction             | no                                           | (2)               |
| <i>fliZ</i>   | RNA:RNA interaction             | no                                           | (2)               |
| <i>gatY</i>   | RNA:RNA interaction             | no                                           | (2)               |
| <i>gdhA</i>   | RNA:RNA interaction             | yes                                          | (2)               |
| <i>glmS</i>   | RNA:RNA interaction             | no                                           | (2)               |
| <i>glpC</i>   | RNA:RNA interaction             | no                                           | (2)               |
| <i>glI</i>    | RNA:RNA interaction             | yes                                          | (2)               |
| <i>gltP</i>   | RNA:RNA interaction             | no                                           | (2)               |
| <i>hdeAB</i>  | regulation                      | no                                           | (8)               |
| <i>hisQ</i>   | RNA:RNA interaction             | no                                           | (2)               |
| <i>lcd</i>    | RNA:RNA interaction             | no                                           | (2)               |
| <i>ilvM</i>   | RNA:RNA interaction             | no                                           | (2)               |
| <i>insl-1</i> | RNA:RNA interaction             | no                                           | (2)               |
| <i>kgtP</i>   | RNA:RNA interaction             | no                                           | (2)               |
| <i>lipA</i>   | RNA:RNA interaction             | no                                           | (2)               |
| <i>livJ</i>   | RNA:RNA interaction             | yes                                          | (2)               |
| <i>livK</i>   | RNA:RNA interaction             | yes                                          | (2)               |
| <i>lrp</i>    | regulation                      | yes                                          | (9)               |
| <i>maeB</i>   | RNA:RNA interaction             | no                                           | (2)               |
| <i>map</i>    | RNA:RNA interaction             | no                                           | (2)               |
| <i>mcrB</i>   | RNA:RNA interaction             | no                                           | (2)               |
| <i>npIA</i>   | RNA:RNA interaction             | no                                           | (2)               |
| <i>ompF</i>   | RNA:RNA interaction             | no                                           | (2)               |
| <i>oppA</i>   | regulation, RNA:RNA interaction | yes                                          | (2, 6, 7)         |
| <i>panD</i>   | RNA:RNA interaction             | yes                                          | (2)               |
| <i>phoP</i>   | regulation                      | no                                           | (2)               |
| <i>prmB</i>   | RNA:RNA interaction             | no                                           | (2)               |
| <i>purU</i>   | RNA:RNA interaction             | no                                           | (2)               |
| <i>raiA</i>   | RNA:RNA interaction             | no                                           | (2)               |
| <i>rhIB</i>   | RNA:RNA interaction             | no                                           | (2)               |
| <i>rihA</i>   | RNA:RNA interaction             | no                                           | (2)               |
| <i>rppH</i>   | RNA:RNA interaction             | no                                           | (2)               |
| <i>sdhE</i>   | RNA:RNA interaction             | no                                           | (2)               |

|             |                                 |     |         |
|-------------|---------------------------------|-----|---------|
| <i>serA</i> | RNA:RNA interaction             | yes | (2)     |
| <i>sstT</i> | regulation, RNA:RNA interaction | no  | (2, 10) |
| <i>thrL</i> | RNA:RNA interaction             | no  | (2)     |
| <i>waaP</i> | RNA:RNA interaction             | no  | (2)     |
| <i>yabQ</i> | RNA:RNA interaction             | no  | (2)     |
| <i>yagU</i> | RNA:RNA interaction             | no  | (2)     |
| <i>ydeE</i> | RNA:RNA interaction             | no  | (2)     |
| <i>yggX</i> | RNA:RNA interaction             | no  | (2)     |
| <i>yhjE</i> | RNA:RNA interaction             | no  | (2)     |
| <i>ydjF</i> | RNA:RNA interaction             | no  | (2)     |
| <i>yifK</i> | RNA:RNA interaction             | yes | (2)     |
| <i>ylcI</i> | RNA:RNA interaction             | no  | (2)     |
| <i>ysgA</i> | RNA:RNA interaction             | yes | (2)     |
| <i>zapE</i> | RNA:RNA interaction             | no  | (2)     |
| <i>zitB</i> | RNA:RNA interaction             | no  | (2)     |

### B. Top computationally predicted GcvB targets without experimental support <sup>b</sup>

| Target      | IntaRNA (11)        |         | TargetRNA2 (12)     |         |
|-------------|---------------------|---------|---------------------|---------|
|             | $\Delta G$ (kJ/mol) | p-value | $\Delta G$ (kJ/mol) | p-value |
| <i>abgT</i> | -19.72              | 0.0008  | -20.81              | 0.0000  |
| <i>aroC</i> | -18.03              | 0.0024  | -15.97              | 0.0000  |
| <i>asnB</i> | -22.74              | 0.0001  | -15.84              | 0.0000  |
| <i>dcyD</i> | -17.94              | 0.0025  | -20.17              | 0.0000  |
| <i>mltC</i> | -16.48              | 0.0060  | -15.67              | 0.0000  |
| <i>panB</i> | -16.30              | 0.0067  | -16.08              | 0.0000  |
| <i>trpE</i> | -18.13              | 0.0023  | -18.60              | 0.0000  |
| <i>yafX</i> | -19.05              | 0.0013  | -16.10              | 0.0000  |
| <i>ilvC</i> | -18.84              | 0.0014  | -14.45              | 0.0010  |
| <i>ybiC</i> | -16.39              | 0.0064  | -14.59              | 0.0010  |
| <i>ilvE</i> | -15.87              | 0.0085  | -15.15              | 0.0010  |
| <i>yhjV</i> | -14.53              | 0.0176  | -14.80              | 0.0010  |
| <i>dtpB</i> | -14.02              | 0.0230  | -14.17              | 0.0010  |
| <i>ybdH</i> | -16.49              | 0.0060  | -12.90              | 0.0040  |
| <i>yadD</i> | -15.48              | 0.0106  | -13.26              | 0.0030  |
| <i>yahl</i> | -18.55              | 0.0017  | -10.36              | 0.0190  |
| <i>yeiG</i> | -15.08              | 0.0132  | -12.37              | 0.0060  |
| <i>yfbL</i> | -14.43              | 0.0186  | -12.72              | 0.0050  |
| <i>fliY</i> | -14.08              | 0.0223  | -12.50              | 0.0050  |
| <i>tynA</i> | -14.20              | 0.0210  | -12.46              | 0.0060  |
| <i>metF</i> | -16.73              | 0.0052  | -9.19               | 0.0340  |
| <i>sucC</i> | -13.78              | 0.0262  | -8.65               | 0.0430  |

<sup>a</sup> Indication of whether experimentally determined GcvB targets were computationally predicted using the same criteria described in part B.

<sup>b</sup> GcvB targets were computationally predicted using the IntaRNA and TargetRNA web servers and targets predicted by both algorithms were considered top candidates and

listed in part B, if not supported by experimental evidence.

<sup>c</sup> Predicted change in free energy with predicted RNA-RNA binding (a measure of affinity with lower numbers reflecting better affinity).

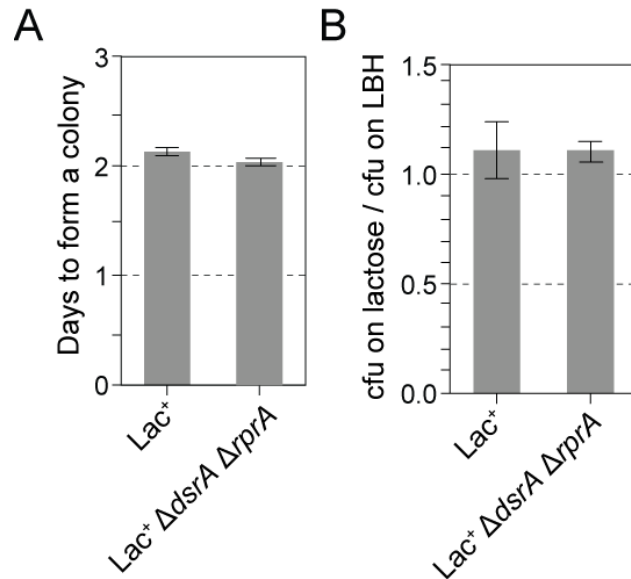

**FIG S1** *Lac<sup>+</sup> ΔdsrA ΔrprA* cells form colonies normally under precise reconstructions of experimental conditions, on selection plates with  $10^9$  non-revertible  $\Delta/lac$  neighbor cells. (A) Normal speed of colony formation of  $\Delta dsrA \Delta rprA$  cells, and (B) similar efficiencies of colony formation under selective conditions, compared with cfu on rich (LBH) medium without neighbor cells. Mean  $\pm$  SEM of three experiments. Strains SMR3856 and SMR22960 plated with  $\Delta/lac$  FC29 neighbor cells in panel A and also in panel B on the lactose medium.

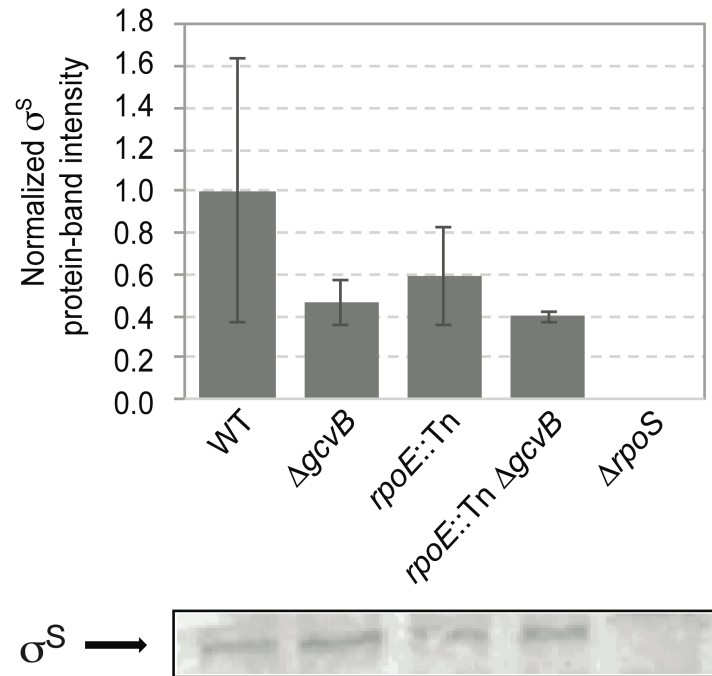

**FIG S2** Blocking the  $\sigma^E$  response with the *rpoE2072::Tn10dCam* allele does not increase  $\sigma^S$  protein levels in starving  $\Delta gcvB$  cells. Western analyses show that  $\sigma^S$  protein levels in stationary phase cells prepared and starved as for the Tet assay are not increased by the *rpoE2072::Tn10dCam* (*rpoE::Tn*) mutation. Top: mean  $\pm$  range, 2 quantified immunoblots normalized to WT. Bottom: representative immunoblot. Strains left to right: SMR10866; SMR21633; SMR10854; SMR22074; SMR10862.

## SUPPLEMENTAL REFERENCES

1. **Datsenko KA, Wanner BL.** 2000. One-step inactivation of chromosomal genes in *Escherichia coli* K-12 using PCR products. *Proc Natl Acad Sci U S A* **97**:6640-6645.
2. **Melamed S, Peer A, Faigenbaum-Romm R, Gatt YE, Reiss N, Bar A, Altvia Y, Argaman L, Margalit H.** 2016. Global Mapping of Small RNA-Target Interactions in Bacteria. *Mol Cell* **63**:884-897.
3. **Jorgensen MG, Nielsen JS, Boysen A, Franch T, Moller-Jensen J, Valentin-Hansen P.** 2012. Small regulatory RNAs control the multi-cellular adhesive lifestyle of *Escherichia coli*. *Mol Microbiol* **84**:36-50.
4. **Mika F, Hengge R.** 2014. Small RNAs in the control of RpoS, CsgD, and biofilm architecture of *Escherichia coli*. *RNA Biol* **11**:494-507.
5. **Pulvermacher SC, Stauffer LT, Stauffer GV.** 2009. Role of the sRNA GcvB in regulation of *cycA* in *Escherichia coli*. *Microbiology* **155**:106-114.
6. **Pulvermacher SC, Stauffer LT, Stauffer GV.** 2008. The role of the small regulatory RNA GcvB in GcvB/mRNA posttranscriptional regulation of *oppA* and *dppA* in *Escherichia coli*. *FEMS Microbiol Lett* **281**:42-50.
7. **Pulvermacher SC, Stauffer LT, Stauffer GV.** 2009. Role of the *Escherichia coli* Hfq protein in GcvB regulation of *oppA* and *dppA* mRNAs. *Microbiology* **155**:115-123.
8. **Stauffer LT, Stauffer GV.** 2012. Antagonistic Roles for GcvA and GcvB in *hdeAB* Expression in *Escherichia coli*. *ISRN Microbiol* **2012**:697308.
9. **Modi SR, Camacho DM, Kohanski MA, Walker GC, Collins JJ.** 2011. Functional characterization of bacterial sRNAs using a network biology approach. *Proc Natl Acad Sci U S A* **108**:15522-15527.
10. **Pulvermacher SC, Stauffer LT, Stauffer GV.** 2009. The small RNA GcvB regulates *sstT* mRNA expression in *Escherichia coli*. *J Bacteriol* **191**:238-248.
11. **Busch A, Richter AS, Backofen R.** 2008. IntaRNA: efficient prediction of bacterial sRNA targets incorporating target site accessibility and seed regions. *Bioinformatics* **24**:2849-2856.
12. **Kery MB, Feldman M, Livny J, Tjaden B.** 2014. TargetRNA2: identifying targets of small regulatory RNAs in bacteria. *Nucleic Acids Res* **42**:W124-129.
